# Supplementary material
Source: PubMed Central journal article supplement (PMC3837090)

## Practice patterns and long-term survival for early stage rectal cancer

Stitzenberg, et al

**Supplemental Tables 1-3. Use of neoadjuvant therapy by surgical approach and T stage over time for all rectal cancers (Table 1); pT1N0 rectal cancers (Table 2); pT2N0 rectal cancers (Table 3).** These data must be interpreted with caution as the variable used for staging throughout the manuscript, the analytic stage, does not necessarily accurately reflect initial stage for cases treated with neoadjuvant therapy. This variable relies on pathologic stage unless this information is missing in which case it is filled in with other available staging information. For patients who receive surgery first, pathologic stage accurately reflects initial staging. However, for patients who receive neoadjuvant therapy, pathologic stage will often be quite different than initial stage. As a result, for Tables 1-3, a portion of the T1N0 and T2N0 patients who received neoadjuvant therapy undoubtedly had Stage II or III rectal cancer prior to treatment, which is why they received neoadjuvant treatment. In addition, multiple competing trends were occurring over this time period, including a decreasing incidence of rectal cancer, a radical shift from adjuvant to neoadjuvant radiation for Stage II and Stage III rectal cancers, and increasing adoption of local excision for early stage rectal tumors. For these reasons, the main analysis was limited to pathological T1N0 and T2N0 cases treated with surgery first.

**Supplemental Table 1A. All rectal cancers.**

|                           |   | 1998   | 1999   | 2000   | 2001   | 2002   | 2003   | 2004   | 2005   | 2006   | 2007   | 2008   | 2009   | 2010   | Total   |
|---------------------------|---|--------|--------|--------|--------|--------|--------|--------|--------|--------|--------|--------|--------|--------|---------|
| LE only                   | n | 2,005  | 2,103  | 2,260  | 2,296  | 2,286  | 2,261  | 2,236  | 2,195  | 2,157  | 2,342  | 2,342  | 2,288  | 2,210  | 28,981  |
|                           | % | 14.62  | 16.17  | 17.15  | 17.4   | 17.53  | 17.89  | 17.74  | 17.51  | 17.18  | 18.68  | 19.21  | 19.18  | 19.1   | 17.6    |
| LE + adjuvant             | n | 554    | 588    | 577    | 537    | 504    | 488    | 440    | 395    | 339    | 390    | 339    | 323    | 242    | 5,716   |
|                           | % | 4.04   | 4.52   | 4.38   | 4.07   | 3.86   | 3.86   | 3.49   | 3.15   | 2.7    | 3.11   | 2.78   | 2.71   | 2.09   | 3.47    |
| Neoadjuvant + LE          | n | 110    | 106    | 113    | 99     | 115    | 142    | 157    | 171    | 180    | 192    | 179    | 191    | 179    | 1,934   |
|                           | % | 0.8    | 0.82   | 0.86   | 0.75   | 0.88   | 1.12   | 1.25   | 1.36   | 1.43   | 1.53   | 1.47   | 1.6    | 1.55   | 1.17    |
| proctectomy only          | n | 4,846  | 4,378  | 4,427  | 4,294  | 4,200  | 3,775  | 3,574  | 3,588  | 3,273  | 2,993  | 2,873  | 2,877  | 2,706  | 47,804  |
|                           | % | 35.33  | 33.67  | 33.59  | 32.55  | 32.21  | 29.87  | 28.35  | 28.62  | 26.06  | 23.88  | 23.57  | 24.12  | 23.38  | 29.02   |
| Proctectomy + adjuvant    | n | 3,793  | 3,425  | 3,244  | 3,300  | 2,877  | 2,261  | 2,087  | 1,827  | 1,572  | 1,379  | 1,232  | 1,076  | 879    | 28,952  |
|                           | % | 27.65  | 26.34  | 24.61  | 25.01  | 22.06  | 17.89  | 16.55  | 14.57  | 12.52  | 11     | 10.11  | 9.02   | 7.6    | 17.58   |
| Neoadjuvant + proctectomy | n | 2,409  | 2,402  | 2,558  | 2,667  | 3,059  | 3,713  | 4,113  | 4,361  | 5,037  | 5,240  | 5,225  | 5,175  | 5,356  | 51,315  |
|                           | % | 17.56  | 18.47  | 19.41  | 20.22  | 23.46  | 29.38  | 32.62  | 34.79  | 40.11  | 41.8   | 42.86  | 43.38  | 46.28  | 31.16   |
| Total                     | n | 13,717 | 13,002 | 13,179 | 13,193 | 13,041 | 12,640 | 12,607 | 12,537 | 12,558 | 12,536 | 12,190 | 11,930 | 11,572 | 164,702 |
|                           | % | 100    | 100    | 100    | 100    | 100    | 100    | 100    | 100    | 100    | 100    | 100    | 100    | 100    | 100     |

**Supplemental Table 1B. pT1N0 rectal cancers.**

|                           |   | 1998  | 1999  | 2000  | 2001  | 2002  | 2003  | 2004  | 2005  | 2006  | 2007  | 2008  | 2009  | 2010  | Total  |
|---------------------------|---|-------|-------|-------|-------|-------|-------|-------|-------|-------|-------|-------|-------|-------|--------|
| LE only                   | n | 534   | 545   | 572   | 605   | 573   | 585   | 578   | 584   | 618   | 668   | 667   | 690   | 1,040 | 8,259  |
|                           | % | 32.29 | 34.19 | 33.83 | 35.09 | 33.49 | 33.31 | 34.59 | 34.03 | 35.5  | 37.61 | 38.55 | 38.87 | 50.76 | 36.56  |
| LE + adjuvant             | n | 83    | 109   | 98    | 98    | 83    | 107   | 89    | 92    | 80    | 105   | 89    | 76    | 63    | 1,172  |
|                           | % | 5.02  | 6.84  | 5.8   | 5.68  | 4.85  | 6.09  | 5.33  | 5.36  | 4.6   | 5.91  | 5.14  | 4.28  | 3.07  | 5.19   |
| Neoadjuvant + LE          | n | 12    | 10    | 12    | 6     | 5     | 9     | 10    | 13    | 13    | 19    | 17    | 17    | 16    | 159    |
|                           | % | 0.73  | 0.63  | 0.71  | 0.35  | 0.29  | 0.51  | 0.6   | 0.76  | 0.75  | 1.07  | 0.98  | 0.96  | 0.78  | 0.7    |
| proctectomy only          | n | 885   | 779   | 872   | 854   | 879   | 854   | 801   | 843   | 780   | 737   | 698   | 704   | 655   | 10,341 |
|                           | % | 53.51 | 48.87 | 51.57 | 49.54 | 51.37 | 48.63 | 47.94 | 49.13 | 44.8  | 41.5  | 40.35 | 39.66 | 31.97 | 45.78  |
| Proctectomy + adjuvant    | n | 48    | 55    | 48    | 64    | 57    | 38    | 39    | 30    | 38    | 22    | 26    | 26    | 22    | 513    |
|                           | % | 2.9   | 3.45  | 2.84  | 3.71  | 3.33  | 2.16  | 2.33  | 1.75  | 2.18  | 1.24  | 1.5   | 1.46  | 1.07  | 2.27   |
| Neoadjuvant + proctectomy | n | 92    | 96    | 89    | 97    | 114   | 163   | 154   | 154   | 212   | 225   | 233   | 262   | 253   | 2,144  |
|                           | % | 5.56  | 6.02  | 5.26  | 5.63  | 6.66  | 9.28  | 9.22  | 8.97  | 12.18 | 12.67 | 13.47 | 14.76 | 12.35 | 9.49   |
| Total                     | n | 1,654 | 1,594 | 1,691 | 1,724 | 1,711 | 1,756 | 1,671 | 1,716 | 1,741 | 1,776 | 1,730 | 1,775 | 2,049 | 22,588 |
|                           | % | 100   | 100   | 100   | 100   | 100   | 100   | 100   | 100   | 100   | 100   | 100   | 100   | 100   | 100    |

**Supplemental Table 1C. pT2N0 rectal cancers.**

|                           |   | 1998  | 1999  | 2000  | 2001  | 2002  | 2003  | 2004  | 2005  | 2006  | 2007  | 2008  | 2009  | 2010  | Total  |
|---------------------------|---|-------|-------|-------|-------|-------|-------|-------|-------|-------|-------|-------|-------|-------|--------|
| LE only                   | n | 118   | 136   | 117   | 127   | 134   | 118   | 127   | 150   | 113   | 101   | 100   | 119   | 114   | 1,574  |
|                           | % | 5.24  | 6.34  | 5.57  | 6.11  | 6.66  | 5.91  | 6.41  | 7.76  | 6.17  | 5.7   | 5.65  | 6.42  | 6.44  | 6.17   |
| LE + adjuvant             | n | 117   | 130   | 132   | 116   | 109   | 127   | 93    | 96    | 70    | 110   | 92    | 97    | 57    | 1,346  |
|                           | % | 5.2   | 6.06  | 6.29  | 5.58  | 5.41  | 6.37  | 4.69  | 4.97  | 3.82  | 6.21  | 5.19  | 5.23  | 3.22  | 5.28   |
| Neoadjuvant + LE          | n | 15    | 19    | 17    | 11    | 22    | 16    | 31    | 26    | 27    | 25    | 26    | 28    | 33    | 296    |
|                           | % | 0.67  | 0.89  | 0.81  | 0.53  | 1.09  | 0.8   | 1.56  | 1.35  | 1.47  | 1.41  | 1.47  | 1.51  | 1.86  | 1.16   |
| proctectomy only          | n | 1,463 | 1,340 | 1,307 | 1,246 | 1,138 | 1,016 | 932   | 899   | 814   | 672   | 690   | 681   | 595   | 12,793 |
|                           | % | 64.96 | 62.44 | 62.24 | 59.9  | 56.53 | 50.93 | 47.05 | 46.53 | 44.46 | 37.92 | 38.96 | 36.75 | 33.6  | 50.17  |
| Proctectomy + adjuvant    | n | 229   | 209   | 204   | 205   | 207   | 116   | 117   | 88    | 85    | 66    | 46    | 62    | 34    | 1,668  |
|                           | % | 10.17 | 9.74  | 9.71  | 9.86  | 10.28 | 5.81  | 5.91  | 4.55  | 4.64  | 3.72  | 2.6   | 3.35  | 1.92  | 6.54   |
| Neoadjuvant + proctectomy | n | 310   | 312   | 323   | 375   | 403   | 602   | 681   | 673   | 722   | 798   | 817   | 866   | 938   | 7,820  |
|                           | % | 13.77 | 14.54 | 15.38 | 18.03 | 20.02 | 30.18 | 34.38 | 34.83 | 39.43 | 45.03 | 46.13 | 46.74 | 52.96 | 30.67  |
| Total                     | n | 2,252 | 2,146 | 2,100 | 2,080 | 2,013 | 1,995 | 1,981 | 1,932 | 1,831 | 1,772 | 1,771 | 1,853 | 1,771 | 25,497 |
|                           | % | 100   | 100   | 100   | 100   | 100   | 100   | 100   | 100   | 100   | 100   | 100   | 100   | 100   | 100    |

**Supplemental Table 2.** Adjusted hazard ratios for death when all T1/T2 patients were included versus for N0 patients only.

|                                      | N any                  |          |          |          | N0                     |          |          |          |
|--------------------------------------|------------------------|----------|----------|----------|------------------------|----------|----------|----------|
|                                      |                        | HR       | 95%CI    |          |                        | HR       | 95% CI   |          |
| T1 (1998-2005)                       | LE+radiation           | 1.161286 | 0.789927 | 1.707227 | LE+radiation           | 1.170602 | 0.713709 | 1.922498 |
|                                      | LE*                    | 1.1725   | 1.093347 | 1.257383 | LE*                    | 1.18765  | 1.10426  | 1.277966 |
|                                      | proctectomy+radiation* | 1.170032 | 1.026975 | 1.333016 | proctectomy+radiation* | 1.28016  | 1.05934  | 1.543336 |
|                                      | Proctectomy            | 1        |          |          | Proctectomy            | 1        |          |          |
| T1 (2003-2005) –<br>adjusted for CCI | LE+radiation           | 1.02893  | 0.458985 | 2.306602 | LE+radiation           | 1.018533 | 0.34166  | 3.036377 |
|                                      | LE                     | 1.087294 | 0.950938 | 1.243202 | LE                     | 1.10901  | 0.963144 | 1.276968 |
|                                      | proctectomy+radiation  | 0.864772 | 0.644125 | 1.161002 | proctectomy+radiation  | 0.862147 | 0.554137 | 1.341359 |
|                                      | Proctectomy            | 1        |          |          | Proctectomy            | 1        |          |          |
| T2 (1998-2005)                       | LE+radiation           | 0.925491 | 0.687729 | 1.245452 | LE+radiation           | 0.960543 | 0.663958 | 1.383218 |
|                                      | LE*                    | 1.307492 | 1.19341  | 1.432481 | LE*                    | 1.388916 | 1.255999 | 1.53024  |
|                                      | proctectomy+radiation  | 0.993483 | 0.931246 | 1.059879 | proctectomy+radiation  | 1.002505 | 0.907904 | 1.107302 |
|                                      | proctectomy            | 1        |          |          | proctectomy            | 1        |          |          |
| T2 (2003-2005) –<br>adjusted for CCI | LE+radiation           | 0.989742 | 0.561317 | 1.74516  | LE+radiation           | 1.000364 | 0.475698 | 2.103706 |
|                                      | LE*                    | 1.439034 | 1.222598 | 1.693786 | LE*                    | 1.535023 | 1.283506 | 1.835828 |
|                                      | proctectomy+radiation  | 0.982916 | 0.854468 | 1.130672 | proctectomy+radiation  | 1.058518 | 0.844015 | 1.327537 |
|                                      | proctectomy            | 1        |          |          | proctectomy            | 1        |          |          |

\*Values statistically significantly different than reference category.

LE = local excision

CCI = Charlson Comorbidity Score

**Supplemental Table 3.** Adjusted hazard ratios for death when proctectomy group is limited to abdominoperineal resection.

|                                      | proctectomy            |          |          |          | APR           |          |          |          |
|--------------------------------------|------------------------|----------|----------|----------|---------------|----------|----------|----------|
|                                      |                        | HR       | 95%CI    |          |               | HR       | 95% CI   |          |
| T1 (1998-2005)                       | LE+radiation           | 1.170602 | 0.713709 | 1.922498 | LE+radiation  | 1.09971  | 0.378484 | 3.195282 |
|                                      | LE*                    | 1.18765  | 1.10426  | 1.277966 | LE            | 1.144559 | 0.990115 | 1.323095 |
|                                      | proctectomy+radiation* | 1.28016  | 1.05934  | 1.543336 | APR+radiation | 1.147203 | 0.731769 | 1.798482 |
|                                      | proctectomy            | 1        |          |          | APR           | 1        |          |          |
| T1 (2003-2005) –<br>adjusted for CCI | LE+radiation           | 1.018533 | 0.34166  | 3.036377 | LE+radiation  | 1.20756  | 0.016567 | 88.01839 |
|                                      | LE                     | 1.10901  | 0.963144 | 1.276968 | LE            | 1.316672 | 0.976755 | 1.774882 |
|                                      | proctectomy+radiation  | 0.862147 | 0.554137 | 1.341359 | APR+radiation | 0.454515 | 0.062356 | 3.31296  |
|                                      | proctectomy            | 1        |          |          | APR           | 1        |          |          |
| T2 (1998-2005)                       | LE+radiation           | 0.960543 | 0.663958 | 1.383218 | LE+radiation  | 0.886168 | 0.510104 | 1.539478 |
|                                      | LE*                    | 1.388916 | 1.255999 | 1.53024  | LE*           | 1.293007 | 1.147692 | 1.456723 |
|                                      | proctectomy+radiation  | 1.002505 | 0.907904 | 1.107302 | APR+radiation | 0.975432 | 0.80286  | 1.185098 |
|                                      | proctectomy            | 1        |          |          | APR           | 1        |          |          |
| T2 (2003-2005) –<br>adjusted for CCI | LE+radiation           | 1.000364 | 0.475698 | 2.103706 | LE+radiation  | 0.945495 | 0.302279 | 2.957408 |
|                                      | LE*                    | 1.535023 | 1.283506 | 1.835828 | LE*           | 1.448574 | 1.150831 | 1.82335  |
|                                      | proctectomy+radiation  | 1.058518 | 0.844015 | 1.327537 | APR+radiation | 1.189375 | 0.782842 | 1.807021 |
|                                      | proctectomy            | 1        |          |          | APR           | 1        |          |          |

\*Values statistically significantly different than reference category.

LE = local excision

CCI = Charlson Comorbidity Score

APR = abdominoperineal resection

**Supplemental Figure.** Unadjusted survival Kaplan-Meier survival curves by treatment group for A. pT1N0 rectal cancer and B. pT2N0 rectal cancer. After adjustment for other relevant demographic and clinical factors, survival differences by treatment group are less pronounced.

A

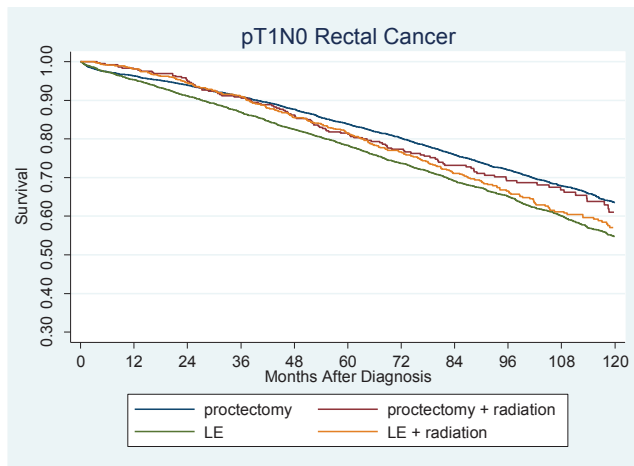

B

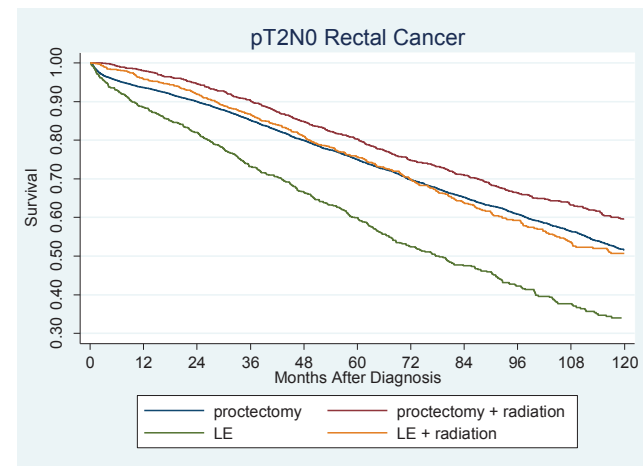

Supplement: supp_JCO.2013.49.1860_DS_JCO_2013_49_1860.pdf [file supp_JCO.2013.49.1860_DS_JCO_2013_49_1860.pdf]
